# Supplementary material for: Relationship of Perivascular Space Markers With Incident Dementia in Cerebral Small Vessel Disease
Source: PubMed Central journal article supplement (PMC10962441; doi:10.1161/strokeaha.123.045857), 2024-03-11
Supplement: str-55-1032-s002.pdf [file str-55-1032-s002.pdf]

## SUPPLEMENTAL MATERIAL

**Table S1** Demographics, CSVD burden and PVS markers comparison between participants included and not included in following analysis

|                                          | Included (n =99) | Not included (n =21) | p-value |
|------------------------------------------|------------------|----------------------|---------|
| Age, years                               | 68.9±10.0        | 75.2±6.9             | 0.001*  |
| Male, n(%)                               | 66(66.7%)        | 12(57.14%)           | 0.562   |
| NART                                     | 100.1±15.3       | 91.9±15.0            | 0.032*  |
| <b>Vascular Risk factors</b>             |                  |                      |         |
| Hypertension, n (%)                      | 92(92.9%)        | 19(90.5%)            | 1.000   |
| Diabetes, n (%)                          | 19(19.2%)        | 5(23.8%)             | 0.857   |
| Hypercholesterolemia, n (%)              | 85(85.9%)        | 18(85.7%)            | 1.000   |
| Smoking                                  |                  |                      | 0.443   |
| current smoker, n (%)                    | 21(21.2%)        | 2(9.5%)              |         |
| ex-smoker, n (%)                         | 40(40.4%)        | 9(42.9%)             |         |
| never smoking, n (%)                     | 38(38.4%)        | 10(47.6%)            |         |
| <b>CSVD burden</b>                       |                  |                      |         |
| WMH, ml                                  | 31.9[17.5-46.8]  | 32.4[16.1-46.5]      | 0.966   |
| Lacune, count                            | 2.0 [1.0-5.0]    | 3.0 [1.0-5.0]        | 0.834   |
| Microbleed, count                        | 0.0[0.0-2.0]     | 0.0[0.0-1.0]         | 0.600   |
| <b>DTI-ALPS and PVS</b>                  |                  |                      |         |
| DTI-ALPS                                 | 1.25 ± 0.1       | 1.27 ± 0.2           | 0.577   |
| Whole brain PVS volumes, mm <sup>3</sup> | 82.0[39.5-166.5] | 66.0[40.0-160.0]     | 0.664   |
| BG PVS volume, mm <sup>3</sup>           | 34.0[13.5-82.5]  | 33.0[17.0-44.0]      | 0.463   |
| WM PVS volume, mm <sup>3</sup>           | 32.0[16.0-70.5]  | 37.0[12.0-81.0]      | 0.757   |

Values are presented as mean (SD) or median [IQR] or n (%). NART = National Adult Reading Test; CSVD= cerebral small vessel disease; WMH = white matter hyperintensity; PVS = perivascular space. BG = basal ganglia; WM = white matter; \* p < 0.05

**Table S2.** Neuropsychological assessment each year

|                               | Baseline                | 1-year                  | 2-year                  | 3-year                  | 4-year                  | 5-year                  |
|-------------------------------|-------------------------|-------------------------|-------------------------|-------------------------|-------------------------|-------------------------|
| <b>Global</b><br>(mean±SD, n) | -0.568±0.822<br>(n= 99) | -0.547±0.816<br>(n= 93) | -0.475±0.873<br>(n= 76) | -0.357±0.786<br>(n= 69) | -0.489±0.884<br>(n= 35) | -0.523±0.901<br>(n= 53) |
| <b>EF</b><br>(mean±SD, n)     | -0.750±1.057<br>(n= 99) | -0.866±1.102<br>(n= 95) | -0.787±1.122<br>(n= 75) | -0.585±1.029<br>(n= 69) | -0.677±1.155<br>(n= 36) | -0.832±1.144<br>(n= 54) |
| <b>PS</b><br>(mean±SD, n)     | -0.909±0.863<br>(n= 99) | -0.934±0.853<br>(n= 92) | -0.867±0.879<br>(n= 76) | -0.879±0.801<br>(n= 70) | -1.014±0.862<br>(n= 33) | -0.973±0.956<br>(n= 50) |
| <b>LTM</b><br>(mean±SD, n)    | 0.032±0.984<br>(n= 99)  | 0.182±1.041<br>(n= 95)  | 0.307±1.087<br>(n= 77)  | 0.527±1.038<br>(n= 70)  | 0.266±1.149<br>(n= 36)  | 0.304±1.110<br>(n= 54)  |

Global = Global cognition; LTM = long delay memory; PS = processing speed; EF = executive function.

**Table S3.** Baseline associations between **BG-PVS** and **WM-PVS** volume and conventional CSVD imaging markers

|            | <b>BG PVS</b> |       | <b>WM PVS</b> |       |
|------------|---------------|-------|---------------|-------|
|            | Coef.         | p-FDR | Coef.         | p-FDR |
| WMH        | 0.089         | 0.464 | 0.029         | 0.759 |
| Lacune     | 0.231         | 0.054 | 0.198         | 0.135 |
| Microbleed | 0.027         | 0.778 | 0.081         | 0.481 |
| PSMD       | 0.121         | 0.464 | 0.111         | 0.395 |
| Median MD  | 0.088         | 0.464 | 0.139         | 0.368 |

WMH = white matter hyperintensity; PSMD = peak width of skeletonized mean diffusivity; MD = mean diffusivity, PVS = perivascular space; BG = basal ganglia; WM = white matter; FDR = False Discovery Rate; \*p < 0.05 after FDR correction.

**Table S4. Association between baseline DTI-ALPS and PVS volume with CSVD progression**

|            | <b>DTI-ALPS</b> |       | <b>Whole brain PVS</b> |       |
|------------|-----------------|-------|------------------------|-------|
|            | Coef.           | p-FDR | Coef.                  | p-FDR |
| WMH        | -1.085          | 0.068 | 0.043                  | 0.937 |
| Lacune     | -2.363          | 0.196 | 2.423                  | 0.316 |
| Microbleed | -3.430          | 0.076 | 0.090                  | 0.937 |
| PSMD       | -0.226          | 0.118 | 0.052                  | 0.937 |
| Median MD  | -0.120          | 0.225 | 0.049                  | 0.937 |

WMH=white matter hyperintensity; PSMD=peak width of skeletonized mean diffusivity; MD=mean diffusivity, PVS=perivascular space.

**Table S5.** The association between baseline **BG PVS** and **WM PVS** volume with CSVD progression

|            | <b>BG PVS</b> |       | <b>WM PVS</b> |       |
|------------|---------------|-------|---------------|-------|
|            | Coef.         | p-FDR | Coef.         | p-FDR |
| WMH        | 0.671         | 0.941 | -0.973        | 0.839 |
| Lacune     | 15.214        | 0.092 | 4.889         | 0.839 |
| Microbleed | 0.425         | 0.941 | -1.516        | 0.839 |
| PSMD       | 0.423         | 0.941 | -0.116        | 0.839 |
| Median MD  | -0.054        | 0.941 | 0.429         | 0.839 |

WMH = white matter hyperintensity; PSMD = peak width of skeletonized mean diffusivity; MD = mean diffusivity, PVS = perivascular space; BG = basal ganglia; WM = white matter; FDR = False Discovery Rate; \* $p < 0.05$  after FDR correction.

**Table S6.** Baseline **BG PVS** and **WM PVS volume** as predictors for cognitive decline over 5 years

|                                                                                                  | <b>BG-PVS</b> |       | <b>WM-PVS</b> |       |
|--------------------------------------------------------------------------------------------------|---------------|-------|---------------|-------|
|                                                                                                  | Coef.         | p-FDR | Coef.         | p-FDR |
| <b>Model 1: Age, sex, NART, and vascular risk factors</b>                                        |               |       |               |       |
| Global                                                                                           | -0.200        | 0.666 | 0.006         | 0.982 |
| EF                                                                                               | -0.196        | 0.694 | 0.333         | 0.828 |
| PS                                                                                               | -0.355        | 0.666 | -0.337        | 0.828 |
| LTM                                                                                              | -0.121        | 0.694 | -0.187        | 0.828 |
| <b>Model 2: Age, sex, NART, vascular risk factors, and baseline visible CSVD imaging markers</b> |               |       |               |       |
| Global                                                                                           | -0.202        | 0.656 | 0.019         | 0.941 |
| EF                                                                                               | -0.207        | 0.670 | 0.333         | 0.911 |
| PS                                                                                               | -0.357        | 0.656 | -0.336        | 0.911 |
| LTM                                                                                              | -0.130        | 0.670 | -0.091        | 0.911 |
| <b>Model 2: Age, sex, NART, vascular risk factors, and baseline PSMD</b>                         |               |       |               |       |
| Global                                                                                           | -0.201        | 0.582 | 0.032         | 0.900 |
| EF                                                                                               | -0.210        | 0.582 | 0.344         | 0.807 |
| PS                                                                                               | -0.333        | 0.582 | -0.338        | 0.807 |
| LTM                                                                                              | -0.168        | 0.582 | -0.194        | 0.807 |
| <b>Model 3: Age, sex, NART, vascular risk factors, and baseline median MD</b>                    |               |       |               |       |
| Global                                                                                           | -0.199        | 0.653 | 0.025         | 0.925 |
| EF                                                                                               | -0.196        | 0.653 | 0.414         | 0.682 |
| PS                                                                                               | -0.352        | 0.653 | -0.351        | 0.682 |
| LTM                                                                                              | -0.136        | 0.653 | -0.248        | 0.682 |

MD = mean diffusivity, WMH = white matter hyperintensity; NART = National Adult Reading Test; PVS = perivascular space; CSVD = cerebral small vessel disease; Global = Global cognition; LTM = long delay memory; PS = processing speed; EF = executive function; BG = basal ganglia; WM = white matter; FDR = False Discovery Rate; \*p < 0.05 after FDR correction.

**Table S7.** The association between first 3 years **PVS markers** change and CSVD progression

|                   | DTI-ALPS change |        | Whole brain PVS change |       | BG PVS change |       | WM PVS change |       |
|-------------------|-----------------|--------|------------------------|-------|---------------|-------|---------------|-------|
|                   | Coef.           | p-FDR  | Coef.                  | p-FDR | Coef.         | p-FDR | Coef.         | p-FDR |
| WMH change        | -0.136          | 0.276  | 0.400                  | 0.575 | 0.213         | 0.850 | 0.343         | 0.608 |
| PSMD change       | -0.125          | 0.276  | 0.423                  | 0.575 | 0.184         | 0.850 | 0.221         | 0.608 |
| Median MD change  | -0.309          | 0.023* | -0.414                 | 0.575 | 0.126         | 0.850 | 0.345         | 0.608 |
| Lacune change     | -0.595          | 0.126  | -0.376                 | 0.774 | -0.024        | 0.966 | -1.590        | 0.608 |
| Microbleed change | -0.271          | 0.276  | -0.260                 | 0.774 | 0.218         | 0.850 | -0.467        | 0.608 |

PVS = perivascular space; WMH = white matter hyperintensity; PSMD = peak width skeleton mean diffusivity; MD = mean diffusivity. BG = basal ganglia; WM = white matter; FDR = False Discovery Rate; \* p-FDR <0.05 after FDR corrected

**Table S8. BG PVS and WM PVS volume as a predictor for incident dementia during 5-year follow-up**

|               | HR (CI)            | p-value |
|---------------|--------------------|---------|
| BG PVS        | 0.754(0.394-1.441) | 0.392   |
| WM PVS        | 1.129(0.697-1.829) | 0.622   |
|               |                    |         |
| BG PVS change | 1.342(0.229-7.857) | 0.744   |
| WM PVS change | 0.650(0.126-3.340) | 0.606   |

Age, sex and NART were added as covariates; for change analysis baseline BG-PVS/ WM PVS volume was additionally added as covariates.

\*p < 0.05. HR = hazard ratio; CI = confidence intervals; PVS = perivascular space; BG = basal ganglia; WM = white matter.



**Figure S1. Longitudinal cohort flow chart**

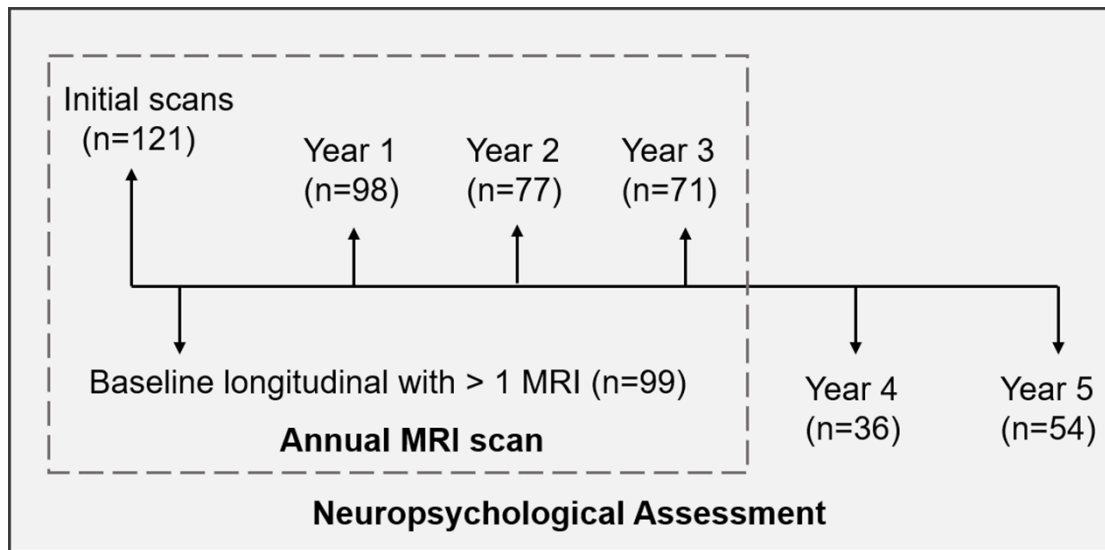

**Figure S2.** Random forest regression analyses for estimating the relative variable importance of age, sex, NART-IQ, CSVD imaging markers (WMH, lacune, and microbleed), conventional DTI markers (median MD and PSMD), and PVS markers (DTI-ALPS, PVS volume) regarding to cognitive performance changes

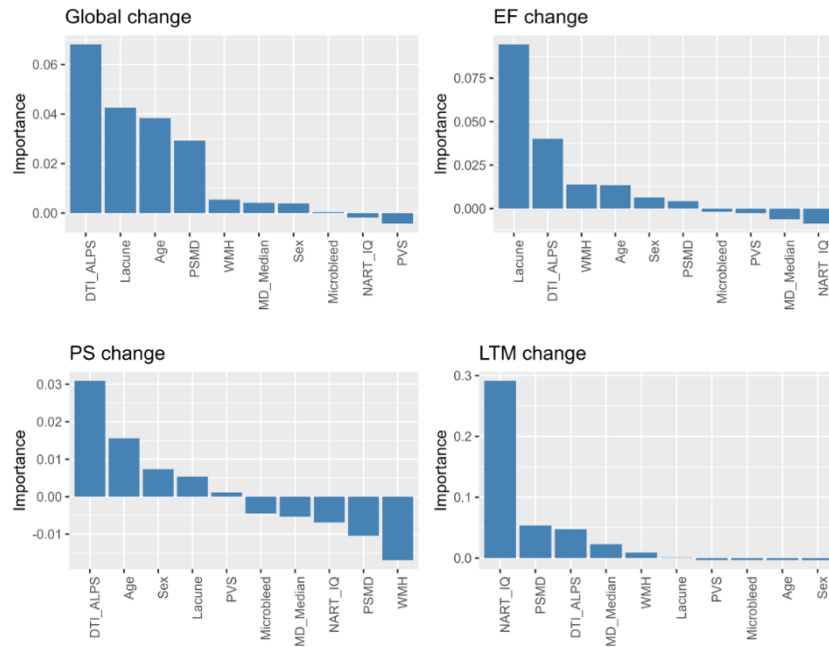

MD = mean diffusivity, WMH = white matter hyperintensity; NART = National Adult Reading Test; PVS = perivascular space; Global = Global cognition; LTM = long delay memory; PS = processing speed; EF = executive function

**Figure S3.** Random Forest regression analyses for estimating the relative variable importance of age, sex, NART-IQ, CSVD imaging markers (WMH, lacune, and microbleed), conventional DTI markers (median MD and PSMD), and PVS markers (DTI-ALPS, PVS volume) regarding dementia

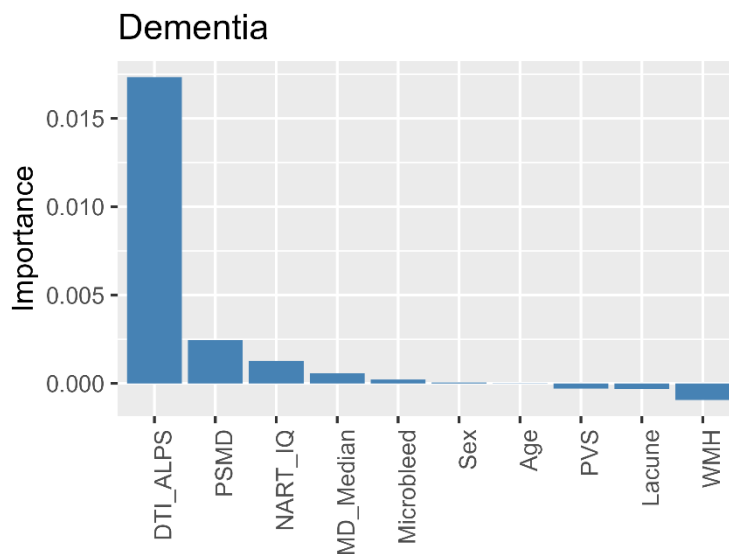

MD = mean diffusivity, WMH = white matter hyperintensity; NART = National Adult Reading Test; PVS = perivascular space; Global = Global cognition; LTM = long delay memory; PS = processing speed; EF = executive function

**Figure S4.** Longitudinal changes of DTI-ALPS and whole brain PVS volume over 3 years.

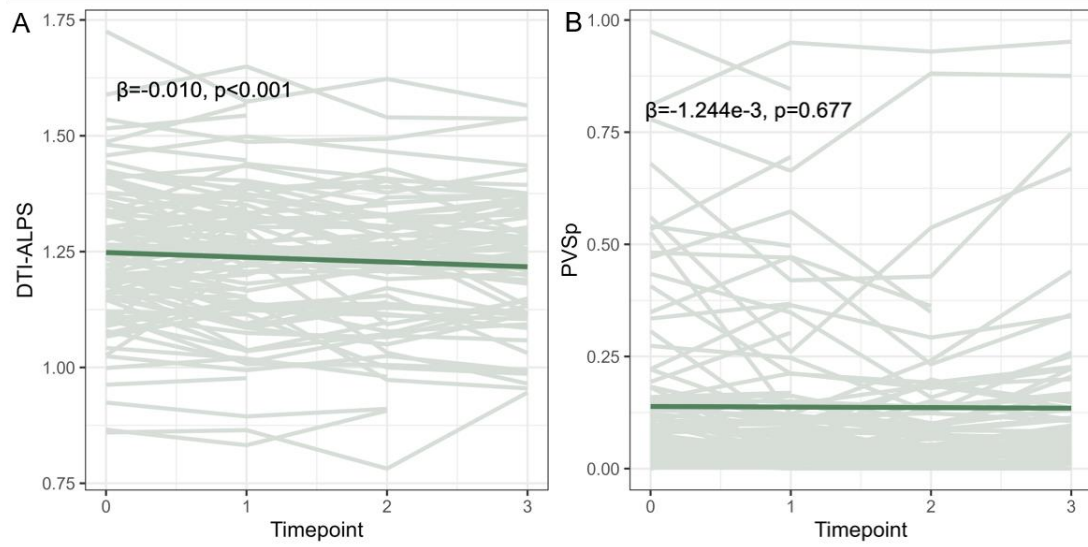

Figure3A: longitudinal changes of DTI-ALPS over 3 years

Figure3B: longitudinal changes of whole brain PVS volume over 3 years, PVSp was calculated by whole brain PVS volume  $\text{mm}^3$ /brain volume ml

**Figure S5.** Longitudinal changes of **BG PVS** and **WM PVS** volume over 3 years

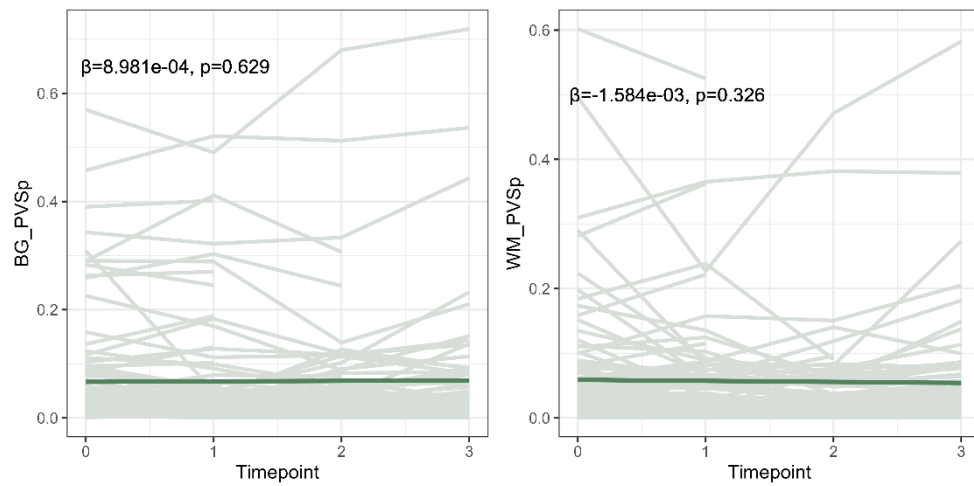

BG\_PVSp was calculated by basal ganglia PVS volume  $\text{mm}^3$ /brain volume ml;  
WM\_PVSp was calculated by white matter PVS volume  $\text{mm}^3$ /brain volume ml
